# Supplementary material
Source: PubMed Central journal article supplement (PMC8409903)
Supplement: res-129-631-s003.pdf [file res-129-631-s003.pdf]

## Major Resources Table

### Antibodies

| Target antigen                                                                       | Vendor or Source              | Catalog #       | Working concentration | Persistent ID / URL                                                                                                                                                                                                                                                                 |
|--------------------------------------------------------------------------------------|-------------------------------|-----------------|-----------------------|-------------------------------------------------------------------------------------------------------------------------------------------------------------------------------------------------------------------------------------------------------------------------------------|
| Anti-human CD41-FITC (HIP8)                                                          | eBioscience                   | 11-0419         | 10:100                | <a href="https://www.thermofisher.com/antibody/product/CD41a-Antibody-clone-HIP8-Monoclonal/11-0419-41">https://www.thermofisher.com/antibody/product/CD41a-Antibody-clone-HIP8-Monoclonal/11-0419-41</a>                                                                           |
| Anti-human CD41-APC, (HIP8)                                                          | eBioscience                   | 17-0419         | 5:100                 | <a href="https://www.thermofisher.com/antibody/primary/query/17-0419">https://www.thermofisher.com/antibody/primary/query/17-0419</a>                                                                                                                                               |
| Anti-human CD41-SB436, (HIP8)                                                        | eBioscience                   | 62-0419-42      | 10:100                | <a href="https://www.thermofisher.com/antibody/primary/query/62-0419">https://www.thermofisher.com/antibody/primary/query/62-0419</a>                                                                                                                                               |
| ACE-2 Antibody (OTI4D2), AF647                                                       | Novus Biologicals             | NBP2-72117AF647 | 5:100                 | <a href="https://www.novusbio.com/products/ace-2-antibody-oti4d2_nbp2-72117af647">https://www.novusbio.com/products/ace-2-antibody-oti4d2_nbp2-72117af647</a>                                                                                                                       |
| Anti-TMPRSS2 Antibody (H-4), AF488                                                   | Santa Cruz Biotechnology, Inc | Sc-515727       | 4:100                 | <a href="https://www.scbt.com/p/tmpRSS2-antibody-h-4?requestFrom=search">https://www.scbt.com/p/tmpRSS2-antibody-h-4?requestFrom=search</a>                                                                                                                                         |
| SARS-CoV-2-Spike1 Subunit, AF488                                                     | R&D Systems                   | FAB105403G      | 5:100                 | <a href="https://www.rndsystems.com/products/sars-cov-2-spike-s1-subunit-alex-fluor-488-conjugated-antibody-1035206_fab105403g">https://www.rndsystems.com/products/sars-cov-2-spike-s1-subunit-alex-fluor-488-conjugated-antibody-1035206_fab105403g</a>                           |
| SARS Nucleocapsid Protein Antibody (AP201054), AF647                                 | Novus Biologicals             | NBP2-90967AF647 | 5:100                 | <a href="https://www.novusbio.com/products/sars-nucleocapsid-protein-antibody-ap201054_nbp2-90967af647">https://www.novusbio.com/products/sars-nucleocapsid-protein-antibody-ap201054_nbp2-90967af647</a>                                                                           |
| SARS-CoV-2 Spike Protein (RBD) Recombinant Human Monoclonal Antibody (P05DHu), AF488 | eBioscience                   | 53-6490-82      | 3:100                 | <a href="https://www.thermofisher.com/antibody/product/SARS-CoV-2-Spike-Protein-RBD-Antibody-clone-P05DHu-Recombinant-Monoclonal/53-6490-82">https://www.thermofisher.com/antibody/product/SARS-CoV-2-Spike-Protein-RBD-Antibody-clone-P05DHu-Recombinant-Monoclonal/53-6490-82</a> |
| Caspase-3 Antibody (31A1067), DyLight 405                                            | Novus Biologicals             | NB100-56708V    | 8:100                 | <a href="https://www.novusbio.com/products/caspase-3-antibody-31a1067_nb100-56708v">https://www.novusbio.com/products/caspase-3-antibody-31a1067_nb100-56708v</a>                                                                                                                   |
| MLKL [p Thr357] Antibody (954724), DyLight 405                                       | Novus Biologicals             | MAB91871V       | 8:100                 | <a href="https://www.novusbio.com/products/mlkl-antibody-954724_mab91871v">https://www.novusbio.com/products/mlkl-antibody-954724_mab91871v</a>                                                                                                                                     |
| Caspase-1 Antibody                                                                   | Novus Biologicals             | NBP1-45433      | 1:1000                | <a href="https://www.novusbio.com/products/caspase-1-antibody_nbp1-45433">https://www.novusbio.com/products/caspase-1-antibody_nbp1-45433</a>                                                                                                                                       |
| Caspase-3 Antibody (31A1067) - (Pro and Active)                                      | Novus Biologicals             | NB100-56708     | 1:1000                | <a href="https://www.novusbio.com/products/caspase-3-antibody-31a1067_nb100-56708">https://www.novusbio.com/products/caspase-3-antibody-31a1067_nb100-56708</a>                                                                                                                     |
| Caspase-11 Antibody (17D9)                                                           | Novus Biologicals             | NB120-10454     | 1:1000                | <a href="https://www.novusbio.com/products/caspase-11-antibody-17d9_nb120-10454">https://www.novusbio.com/products/caspase-11-antibody-17d9_nb120-10454</a>                                                                                                                         |
| MLKL [p Thr357] Antibody (954724)                                                    | Novus Biologicals             | MAB91871        | 1:1000                | <a href="https://www.novusbio.com/products/mlkl-antibody-954724_mab91871">https://www.novusbio.com/products/mlkl-antibody-954724_mab91871</a>                                                                                                                                       |
| MLKL Antibody (3B2)                                                                  | Novus Biologicals             | H00197259-M02   | 1:1000                | <a href="https://www.novusbio.com/products/mlkl-antibody-3b2_h00197259-m02">https://www.novusbio.com/products/mlkl-antibody-3b2_h00197259-m02</a>                                                                                                                                   |
| GSDMDC1 Antibody                                                                     | Novus Biologicals             | NBP2-33422      | 1:1000                | <a href="https://www.novusbio.com/products/gsdmdc1-antibody_nbp2-33422">https://www.novusbio.com/products/gsdmdc1-antibody_nbp2-33422</a>                                                                                                                                           |
| Recombinant Anti-cleaved N-terminal GSDMD antibody [EPR20829-408]                    | Abcam                         | Ab215203        | 1:1000                | <a href="https://www.abcam.com/cleaved-n-terminal-gsdmd-antibody-epr20829-408-ab215203.html">https://www.abcam.com/cleaved-n-terminal-gsdmd-antibody-epr20829-408-ab215203.html</a>                                                                                                 |

|                                             |                                |         |                            |                                                                                                                                                                                                                                                                                                                                                                                       |
|---------------------------------------------|--------------------------------|---------|----------------------------|---------------------------------------------------------------------------------------------------------------------------------------------------------------------------------------------------------------------------------------------------------------------------------------------------------------------------------------------------------------------------------------|
| Anti-Actin Antibody (C-2)                   | Santa Cruz Biotechnology, Inc. | sc-8432 | 1:1000                     | <a href="https://www.scbt.com/p/actin-antibody-c-2">https://www.scbt.com/p/actin-antibody-c-2</a>                                                                                                                                                                                                                                                                                     |
| Anti-ACE2 antibody                          | Abcam                          | 15348   | 1:1000                     | <a href="https://www.abcam.com/ace2-antibody-ab15348.html">https://www.abcam.com/ace2-antibody-ab15348.html</a>                                                                                                                                                                                                                                                                       |
| Recombinant Anti-TMPRSS2 antibody [EPR3861] | Abcam                          | 92323   | 1:1000                     | <a href="https://www.abcam.com/tmpRSS2-antibody-epr3861-ab92323.html">https://www.abcam.com/tmpRSS2-antibody-epr3861-ab92323.html</a>                                                                                                                                                                                                                                                 |
| $\alpha$ -Tubulin (DM1A) Mouse mAb          | Cell Signaling Technology      | 3873S   | 1:5000                     | <a href="https://www.cellsignal.com/products/primary-antibodies/a-tubulin-dm1a-mouse-mab/3873?site-search-type=Products&amp;N=4294956287&amp;Ntt=3873s&amp;fromPage=plp&amp;requestid=578192">https://www.cellsignal.com/products/primary-antibodies/a-tubulin-dm1a-mouse-mab/3873?site-search-type=Products&amp;N=4294956287&amp;Ntt=3873s&amp;fromPage=plp&amp;requestid=578192</a> |
| Mouse anti-rabbit IgG-HRP                   | Santa Cruz Biotechnology, Inc. | sc-2357 | 1:10000                    | <a href="https://www.scbt.com/p/mouse-anti-rabbit-igg-hrp?requestFrom=search">https://www.scbt.com/p/mouse-anti-rabbit-igg-hrp?requestFrom=search</a>                                                                                                                                                                                                                                 |
| Goat anti-mouse IgG-HRP                     | Santa Cruz Biotechnology, Inc. | sc-2005 | 1:10000<br>1:20000 (actin) | <a href="https://www.scbt.com/p/goat-anti-mouse-igg-hrp?requestFrom=search">https://www.scbt.com/p/goat-anti-mouse-igg-hrp?requestFrom=search</a>                                                                                                                                                                                                                                     |
| Chicken anti-rat IgG-HRP                    | Santa Cruz Biotechnology, Inc. | sc-2956 | 1:10000                    | Cat. No: sc-2956                                                                                                                                                                                                                                                                                                                                                                      |

#### RT-qPCR Primer Assays

| Gene Name | TaqMan Assay ID# | Manufacturer            | Persistent ID / URL                                                                                                                                                                                                       |
|-----------|------------------|-------------------------|---------------------------------------------------------------------------------------------------------------------------------------------------------------------------------------------------------------------------|
| ACTB      | Hs99999903_m1    | ThermoFisher Scientific | <a href="https://www.thermofisher.com/taqman-gene-expression/product/Hs99999903_m1?CID=&amp;ICID=&amp;subtype=">https://www.thermofisher.com/taqman-gene-expression/product/Hs99999903_m1?CID=&amp;ICID=&amp;subtype=</a> |
| ACE2      | Hs01085333_m1    |                         | <a href="https://www.thermofisher.com/taqman-gene-expression/product/Hs01085333_m1?CID=&amp;ICID=&amp;subtype=">https://www.thermofisher.com/taqman-gene-expression/product/Hs01085333_m1?CID=&amp;ICID=&amp;subtype=</a> |
| ACE2      | Hs01085335_m1    |                         | <a href="https://www.thermofisher.com/taqman-gene-expression/product/Hs01085335_m1?CID=&amp;ICID=&amp;subtype=">https://www.thermofisher.com/taqman-gene-expression/product/Hs01085335_m1?CID=&amp;ICID=&amp;subtype=</a> |
| ACE2      | Hs00222343_m1    |                         | <a href="https://www.thermofisher.com/taqman-gene-expression/product/Hs00222343_m1?CID=&amp;ICID=&amp;subtype=">https://www.thermofisher.com/taqman-gene-expression/product/Hs00222343_m1?CID=&amp;ICID=&amp;subtype=</a> |
| CASP1     | Hs00354836_m1    |                         | <a href="https://www.thermofisher.com/taqman-gene-expression/product/Hs00354836_m1?CID=&amp;ICID=&amp;subtype=">https://www.thermofisher.com/taqman-gene-expression/product/Hs00354836_m1?CID=&amp;ICID=&amp;subtype=</a> |
| CASP3     | Hs00234387_m1    |                         | <a href="https://www.thermofisher.com/taqman-gene-expression/product/Hs00234387_m1?CID=&amp;ICID=&amp;subtype=">https://www.thermofisher.com/taqman-gene-expression/product/Hs00234387_m1?CID=&amp;ICID=&amp;subtype=</a> |
| CASP4     | Hs01031951_m1    |                         | <a href="https://www.thermofisher.com/taqman-gene-expression/product/Hs01031951_m1?CID=&amp;ICID=&amp;subtype=">https://www.thermofisher.com/taqman-gene-expression/product/Hs01031951_m1?CID=&amp;ICID=&amp;subtype=</a> |
| CASP7     | Hs00169152_m1    |                         | <a href="https://www.thermofisher.com/taqman-gene-expression/product/Hs00169152_m1?CID=&amp;ICID=&amp;subtype=">https://www.thermofisher.com/taqman-gene-expression/product/Hs00169152_m1?CID=&amp;ICID=&amp;subtype=</a> |
| CASP8     | Hs01018151_m1    |                         | <a href="https://www.thermofisher.com/taqman-gene-expression/product/Hs01018151_m1?CID=&amp;ICID=&amp;subtype=">https://www.thermofisher.com/taqman-gene-expression/product/Hs01018151_m1?CID=&amp;ICID=&amp;subtype=</a> |
| CASP9     | Hs00962278_m1    |                         | <a href="https://www.thermofisher.com/taqman-gene-expression/product/Hs00962278_m1?CID=&amp;ICID=&amp;subtype=">https://www.thermofisher.com/taqman-gene-expression/product/Hs00962278_m1?CID=&amp;ICID=&amp;subtype=</a> |
| GSDMD     | Hs00988209_m1    |                         | <a href="https://www.thermofisher.com/taqman-gene-expression/product/Hs00988209_m1?CID=&amp;ICID=&amp;subtype=">https://www.thermofisher.com/taqman-gene-expression/product/Hs00988209_m1?CID=&amp;ICID=&amp;subtype=</a> |
| MLKL      | Hs04188505_m1    |                         | <a href="https://www.thermofisher.com/taqman-gene-expression/product/Hs04188505_m1?CID=&amp;ICID=&amp;subtype=">https://www.thermofisher.com/taqman-gene-expression/product/Hs04188505_m1?CID=&amp;ICID=&amp;subtype=</a> |
| TMPRSS2   | Hs00237175_m1    |                         | <a href="https://www.thermofisher.com/taqman-gene-expression/product/Hs00237175_m1?CID=&amp;ICID=&amp;subtype=">https://www.thermofisher.com/taqman-gene-expression/product/Hs00237175_m1?CID=&amp;ICID=&amp;subtype=</a> |
| Gene Name | Catalog Number   | Manufacturer            | Persistent ID / URL                                                                                                                                                                                                       |

|              |          |                             |                                                                                                                                 |
|--------------|----------|-----------------------------|---------------------------------------------------------------------------------------------------------------------------------|
| 2019-nCoV N1 | 10006713 | Integrated DNA Technologies | <a href="https://www.idtdna.com/site/order/stock/partnbr/10006713">https://www.idtdna.com/site/order/stock/partnbr/10006713</a> |
| 2019-nCoV N2 |          |                             |                                                                                                                                 |

### Cultured Cells

| Name                                    | Vendor or Source                                           | Sex (F, M, or unknown)    | Persistent ID / URL                                                                                                                                                                                                                |
|-----------------------------------------|------------------------------------------------------------|---------------------------|------------------------------------------------------------------------------------------------------------------------------------------------------------------------------------------------------------------------------------|
| VERO C1008 [VERO 76, clone E6, Vero E6] | ATCC CRL-1586                                              | Animal cells, sex unknown | <a href="https://www.atcc.org/products/crl-1586">https://www.atcc.org/products/crl-1586</a>                                                                                                                                        |
| HEK293T/17                              | ATCC, CRL-11268                                            | N/A                       | <a href="http://www.atcc.org/search#q=CRL-11268&amp;sort=relevancy&amp;numberOfResults=12&amp;f:Contenttype=[Products]">www.atcc.org/search#q=CRL-11268&amp;sort=relevancy&amp;numberOfResults=12&amp;f:Contenttype=[Products]</a> |
| A549 cells                              | ATCC, CCL-185                                              | M                         | <a href="http://www.atcc.org/products/ccl-185">www.atcc.org/products/ccl-185</a>                                                                                                                                                   |
| A549 <sup>ace2+tmprss2</sup>            | Dr. René Maehr, University of Massachusetts Medical School | M                         | See Methods for clonal cell generation                                                                                                                                                                                             |

### Other

| Description                                                                  | Source / Repository                           | Persistent ID / URL                                                                                                                                                                                                                                                                                                                                                                                                                               |
|------------------------------------------------------------------------------|-----------------------------------------------|---------------------------------------------------------------------------------------------------------------------------------------------------------------------------------------------------------------------------------------------------------------------------------------------------------------------------------------------------------------------------------------------------------------------------------------------------|
| BD Vacutainer™ Glass Blood Collection Tubes with Acid Citrate Dextrose (ACD) | Fisher Scientific                             | <a href="https://www.fishersci.com/shop/products/bd-vacutainer-glass-blood-collection-tubes-acid-citrate-dextrose-acd-3/0268426?searchHijack=true&amp;searchTerm=02-684-26&amp;searchType=RAPID&amp;matchedCatNo=02-684-26">https://www.fishersci.com/shop/products/bd-vacutainer-glass-blood-collection-tubes-acid-citrate-dextrose-acd-3/0268426?searchHijack=true&amp;searchTerm=02-684-26&amp;searchType=RAPID&amp;matchedCatNo=02-684-26</a> |
| PGE1, Prostaglandin E1                                                       | Millipore Sigma                               | <a href="https://www.sigmaaldrich.com/US/en/search/538903-1mg?focus=products&amp;page=1&amp;perPage=30&amp;sort=relevance&amp;term=538903-1mg&amp;type=product">https://www.sigmaaldrich.com/US/en/search/538903-1mg?focus=products&amp;page=1&amp;perPage=30&amp;sort=relevance&amp;term=538903-1mg&amp;type=product</a>                                                                                                                         |
| Roche - Red Blood Cell Lysis Buffer                                          | Fisher Scientific                             | <a href="https://www.fishersci.com/shop/products/red-blood-cell-lysis-b-100-ml/501003296#?keyword=50-100-3296">https://www.fishersci.com/shop/products/red-blood-cell-lysis-b-100-ml/501003296#?keyword=50-100-3296</a>                                                                                                                                                                                                                           |
| QIAamp® vRNA Mini Kit                                                        | Qiagen                                        | <a href="https://www.qiagen.com/us/search/products/?query=52904">https://www.qiagen.com/us/search/products/?query=52904</a>                                                                                                                                                                                                                                                                                                                       |
| miRNeasy® Mini Kit                                                           | Qiagen                                        | <a href="https://www.qiagen.com/us/search/products/?query=217004">https://www.qiagen.com/us/search/products/?query=217004</a>                                                                                                                                                                                                                                                                                                                     |
| RNase-Free DNase Set                                                         | Qiagen                                        | <a href="https://www.qiagen.com/us/search/products/?query=79254">https://www.qiagen.com/us/search/products/?query=79254</a>                                                                                                                                                                                                                                                                                                                       |
| TRIzol™ LS Reagent                                                           | Thermo Fisher Scientific                      | <a href="https://www.thermofisher.com/order/catalog/product/10296010?SID=srch-srp-10296010#/10296010?SID=srch-srp-10296010">https://www.thermofisher.com/order/catalog/product/10296010?SID=srch-srp-10296010#/10296010?SID=srch-srp-10296010</a>                                                                                                                                                                                                 |
| Ion AmpliSeq™ Transcriptome Human Gene Expression Kit                        | Thermo Fisher Scientific                      | <a href="https://www.thermofisher.com/order/catalog/product/A26327?SID=srch-hj-A26327#/A26327?SID=srch-hj-A26327">https://www.thermofisher.com/order/catalog/product/A26327?SID=srch-hj-A26327#/A26327?SID=srch-hj-A26327</a>                                                                                                                                                                                                                     |
| High Capacity cDNA RT Kit                                                    | Thermo Fisher Scientific - Applied Biosystems | <a href="https://www.thermofisher.com/order/catalog/product/4368813?SID=srch-srp-4368813#/4368813?SID=srch-srp-4368813">https://www.thermofisher.com/order/catalog/product/4368813?SID=srch-srp-4368813#/4368813?SID=srch-srp-4368813</a>                                                                                                                                                                                                         |
| TaqMan™ PreAmp Master Mix                                                    | Thermo Fisher Scientific -                    | <a href="https://www.thermofisher.com/order/catalog/product/4391128?SID=srch-srp-4391128#/4391128?SID=srch-srp-4391128">https://www.thermofisher.com/order/catalog/product/4391128?SID=srch-srp-4391128#/4391128?SID=srch-srp-4391128</a>                                                                                                                                                                                                         |

|                                                                  |                                               |                                                                                                                                                                                                                                                                                                                                                                                         |
|------------------------------------------------------------------|-----------------------------------------------|-----------------------------------------------------------------------------------------------------------------------------------------------------------------------------------------------------------------------------------------------------------------------------------------------------------------------------------------------------------------------------------------|
|                                                                  | Applied Biosystems                            |                                                                                                                                                                                                                                                                                                                                                                                         |
| DNA Suspension Buffer                                            | Teknova, Inc.                                 | <a href="https://www.teknova.com/dna-suspension-buffer-ph-8-0-dnase-rnase-tested-pcr-grade">https://www.teknova.com/dna-suspension-buffer-ph-8-0-dnase-rnase-tested-pcr-grade</a>                                                                                                                                                                                                       |
| TaqMan™ Gene Expression Master Mix                               | Thermo Fisher Scientific - Applied Biosystems | <a href="https://www.thermofisher.com/order/catalog/product/4369016?SID=srch-srp-4369016#/4369016?SID=srch-srp-4369016">https://www.thermofisher.com/order/catalog/product/4369016?SID=srch-srp-4369016#/4369016?SID=srch-srp-4369016</a>                                                                                                                                               |
| SARS-CoV-2 virus                                                 | NIAID/ATCC                                    | <a href="https://www.beiresources.org/Catalog/animalviruses/NR-52281.aspx">https://www.beiresources.org/Catalog/animalviruses/NR-52281.aspx</a>                                                                                                                                                                                                                                         |
| PEG Virus Purification Kit                                       | Abcam                                         | <a href="https://www.abcam.com/peg-virus-precipitation-kit-ab102538.html">https://www.abcam.com/peg-virus-precipitation-kit-ab102538.html</a>                                                                                                                                                                                                                                           |
| Lysing Solution 10X Concentrate                                  | BD Biosciences                                | <a href="https://www.bdbiosciences.com/en-us/products/reagents/flow-cytometry-reagents/clinical-diagnostics/buffers-and-supporting-reagents-ivd-ce-ivd/lysing-solution-10x-concentrate.349202">https://www.bdbiosciences.com/en-us/products/reagents/flow-cytometry-reagents/clinical-diagnostics/buffers-and-supporting-reagents-ivd-ce-ivd/lysing-solution-10x-concentrate.349202</a> |
| RIPA Buffer                                                      | Millipore Sigma                               | <a href="https://www.sigmaaldrich.com/US/en/product/sigma/r0278?context=product">https://www.sigmaaldrich.com/US/en/product/sigma/r0278?context=product</a>                                                                                                                                                                                                                             |
| Complete™ Protease Tablets (Roche)                               | Fisher Scientific                             | <a href="https://www.fishersci.com/shop/products/complete-20-tablets/501003279#?keyword=11697498001">https://www.fishersci.com/shop/products/complete-20-tablets/501003279#?keyword=11697498001</a>                                                                                                                                                                                     |
| Complete™ Mini Protease Tablets (Roche)                          | Millipore Sigma                               | <a href="https://www.sigmaaldrich.com/US/en/product/roche/11836153001?context=product">https://www.sigmaaldrich.com/US/en/product/roche/11836153001?context=product</a>                                                                                                                                                                                                                 |
| PhosSTOP™ Phosphatase Inhibitor Tablets (Roche)                  | Millipore Sigma                               | <a href="https://www.sigmaaldrich.com/US/en/product/roche/phossro?context=product">https://www.sigmaaldrich.com/US/en/product/roche/phossro?context=product</a>                                                                                                                                                                                                                         |
| 4–20% Mini-PROTEAN® TGX Stain-Free™ Protein Gels, 10 well, 30 µl | Bio-rad                                       | <a href="https://www.bio-rad.com/en-us/sku/4568093-4-20-mini-protean-tgx-stain-free-protein-gels-10-well-30-ul?ID=4568093">https://www.bio-rad.com/en-us/sku/4568093-4-20-mini-protean-tgx-stain-free-protein-gels-10-well-30-ul?ID=4568093</a>                                                                                                                                         |
| Human Brain Whole Tissue Lysate (Adult Whole Normal)             | Novus Biologicals                             | <a href="https://www.novusbio.com/products/brain-lysate_nb820-59177">https://www.novusbio.com/products/brain-lysate_nb820-59177</a>                                                                                                                                                                                                                                                     |
| pHDM-G                                                           | Dr. Rene Maehr, UMMS                          | N/A                                                                                                                                                                                                                                                                                                                                                                                     |
| pHDM-Hgpm2                                                       | Dr. Rene Maehr, UMMS                          | N/A                                                                                                                                                                                                                                                                                                                                                                                     |
| pHDM-tat1b                                                       | Dr. Rene Maehr, UMMS                          | N/A                                                                                                                                                                                                                                                                                                                                                                                     |
| pRC/CMV-rev1b                                                    | Dr. Rene Maehr, UMMS                          | N/A                                                                                                                                                                                                                                                                                                                                                                                     |
| TransIT-293 transfection reagent                                 | Mirus Bio                                     | <a href="http://www.mirusbio.com/products/transfection/transit-293-transfection-reagent#product:MIR%202700">www.mirusbio.com/products/transfection/transit-293-transfection-reagent#product:MIR%202700</a>                                                                                                                                                                              |
| Fetal Bovine Serum                                               | Thermo Fisher Scientific - Gibco              | <a href="https://www.thermofisher.com/order/catalog/product/10437028?SID=srch-srp-10437028#/10437028?SID=srch-srp-10437028">https://www.thermofisher.com/order/catalog/product/10437028?SID=srch-srp-10437028#/10437028?SID=srch-srp-10437028</a>                                                                                                                                       |
| MEM NEAA                                                         | Thermo Fisher Scientific - Gibco              | <a href="https://www.thermofisher.com/order/catalog/product/11140050?SID=srch-srp-11140050#/11140050?SID=srch-srp-11140050">https://www.thermofisher.com/order/catalog/product/11140050?SID=srch-srp-11140050#/11140050?SID=srch-srp-11140050</a>                                                                                                                                       |
| Penicillin-streptomycin                                          | Corning - VWR                                 | <a href="https://us.vwr.com/store/product/10243589/penicillin-streptomycin-solution-corning-100x">https://us.vwr.com/store/product/10243589/penicillin-streptomycin-solution-corning-100x</a>                                                                                                                                                                                           |
| Sodium pyruvate                                                  | Thermo Fisher Scientific - Gibco              | <a href="https://www.thermofisher.com/order/catalog/product/11360070?SID=srch-hj-11360070#/11360070?SID=srch-hj-11360070">https://www.thermofisher.com/order/catalog/product/11360070?SID=srch-hj-11360070#/11360070?SID=srch-hj-11360070</a>                                                                                                                                           |
| Glutamax                                                         | Thermo Fisher Scientific - Gibco              | <a href="https://www.thermofisher.com/order/catalog/product/35050061?SID=srch-srp-35050061#/35050061?SID=srch-srp-35050061">https://www.thermofisher.com/order/catalog/product/35050061?SID=srch-srp-35050061#/35050061?SID=srch-srp-35050061</a>                                                                                                                                       |
| Puromycin                                                        | Thermo Fisher/Invitrogen - Gibco              | <a href="https://www.thermofisher.com/order/catalog/product/A1113803?SID=srch-hj-A1113803#/A1113803?SID=srch-hj-A1113803">https://www.thermofisher.com/order/catalog/product/A1113803?SID=srch-hj-A1113803#/A1113803?SID=srch-hj-A1113803</a>                                                                                                                                           |
| DX600                                                            | Cayman Chemical                               | <a href="https://www.caymanchem.com/search?q=22186">https://www.caymanchem.com/search?q=22186</a>                                                                                                                                                                                                                                                                                       |
|                                                                  |                                               |                                                                                                                                                                                                                                                                                                                                                                                         |
