# Supplementary material
Source: PubMed Central journal article supplement (PMC8409903)

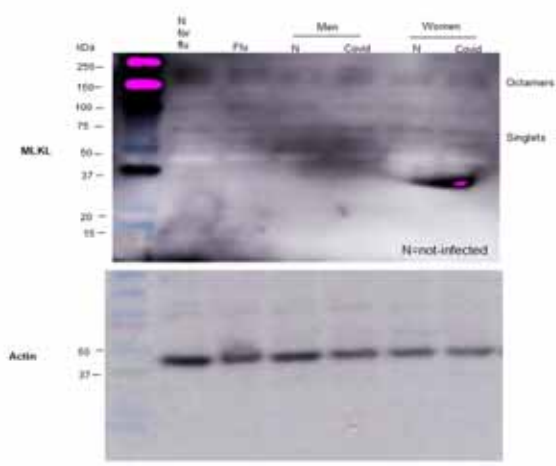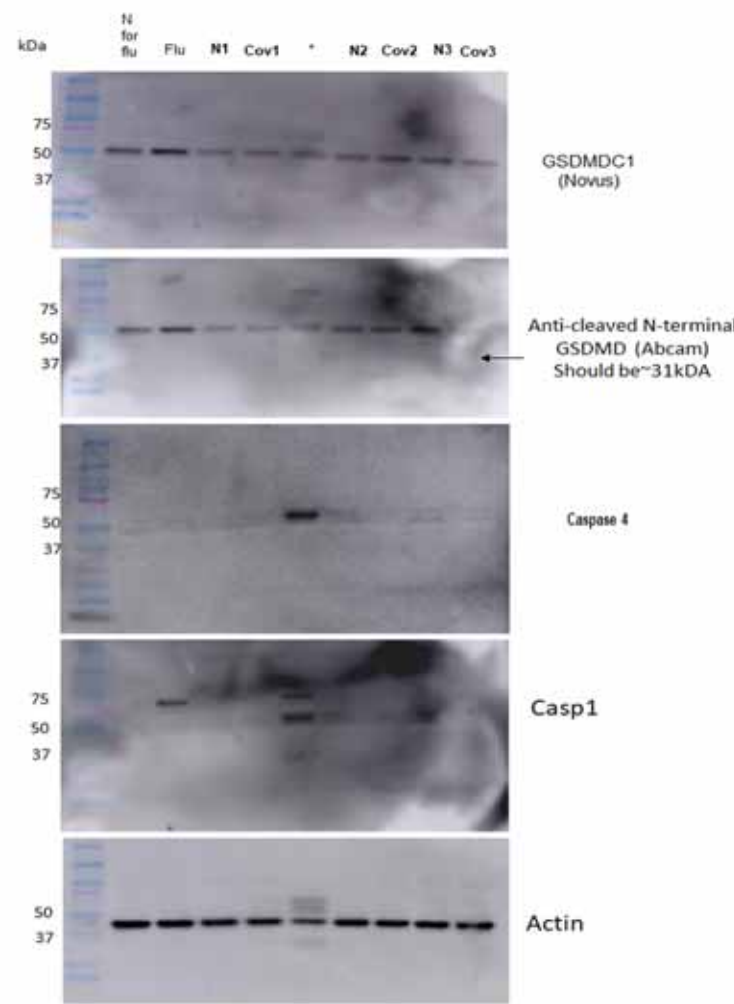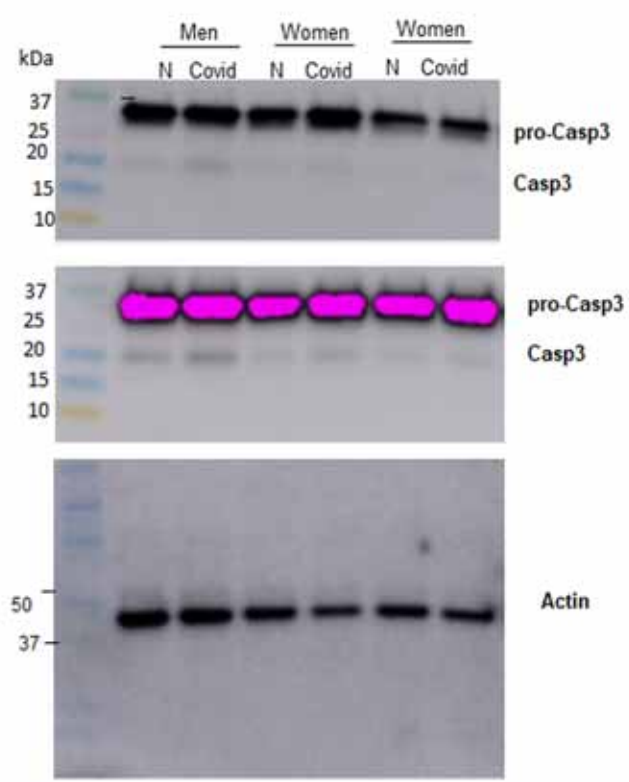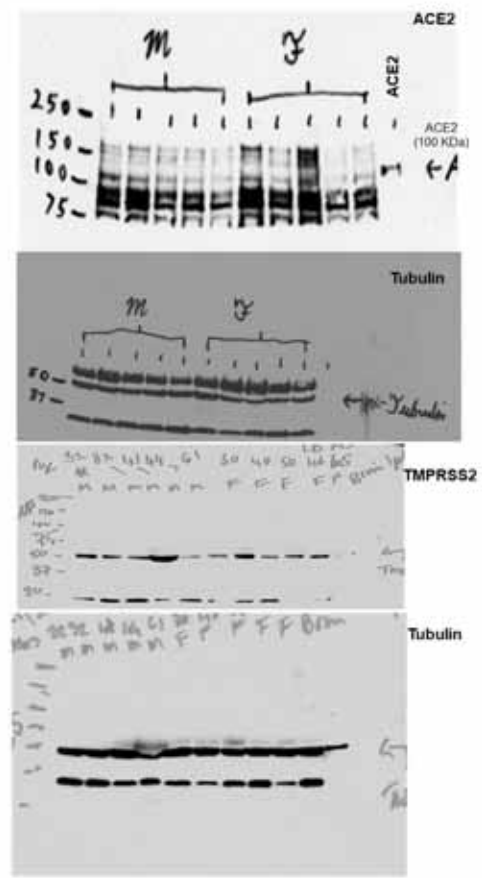

Supplement: res-129-631-s005.pdf [file res-129-631-s005.pdf]
